# Supplementary material for: Refinement of a Live Attenuated Salmonella enterica Serovar Newport Vaccine with Improved Safety
Source: MDPI journal article supplement (doi:10.3390/vaccines9010057), 2021-01-16
Supplement: s1 [file s1]

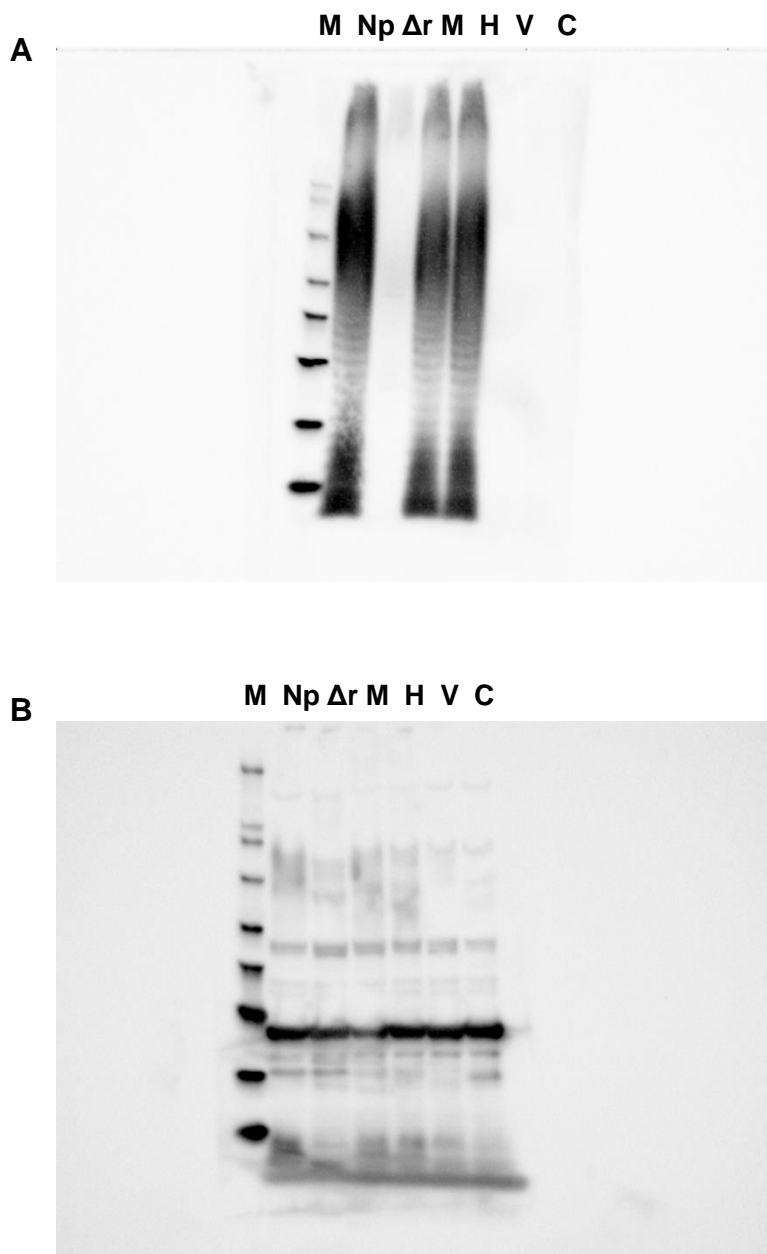

**Figure S1.** Unmodified Western blots showing specificity of antibodies elicited by live attenuated *S. Newport* CVD 1979 vaccine to A) LPS and B) whole cell lysates.
